# Supplementary material for: Sirtuin 3 Deficiency Accelerates Hypertensive Cardiac Remodeling by Impairing Angiogenesis
Source: PubMed Central journal article supplement — J Am Heart Assoc. 2017 Aug 19;6(8):e006114. doi: 10.1161/JAHA.117.006114 (PMC5586452; doi:10.1161/jaha.117.006114), 2017-08-19

# **SUPPLEMENTAL MATERIAL**

**Figure S1. Systolic blood pressure in Ang II -induced mice.** (A) Systolic blood pressure profile of WT and SIRT3<sup>-/-</sup> mice measured every two days for two weeks. (B) Systolic blood pressure of WT and SIRT3<sup>-/-</sup> mice infused with Ang II in day 14. The values are presented as the means  $\pm$  SEM. **\*\*** $p$ <0.01 vs. genotype-matched sham mice.

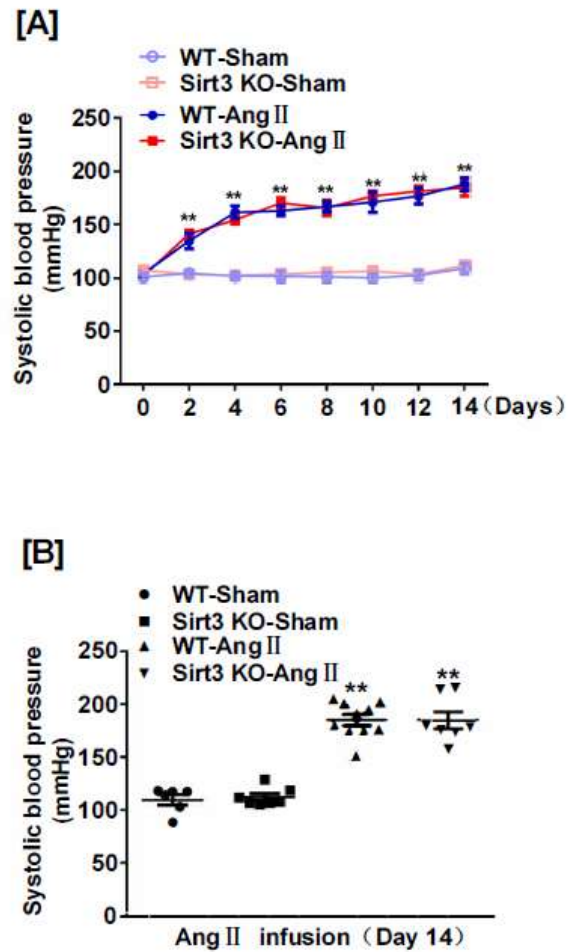

**Figure S2. Sirt3 expression in CMVECs.** (A) SIRT3 expression was detected by western blotting with quantitative analysis in SIRT3-shRNA or negative control cells. (B) SIRT3 expression was detected by western blotting with quantitative analysis in LV-SIRT3 or negative control infected cells. Results are expressed as fold-change over untreated vector-infected cells. Data represent the means  $\pm$  SEM. \* $p$ <0.05, \*\* $p$ <0.01 vs. untreated vector-infected cells; # $p$ <0.05, ## $p$ <0.01 vs. AngII-treated vector-infected cells.

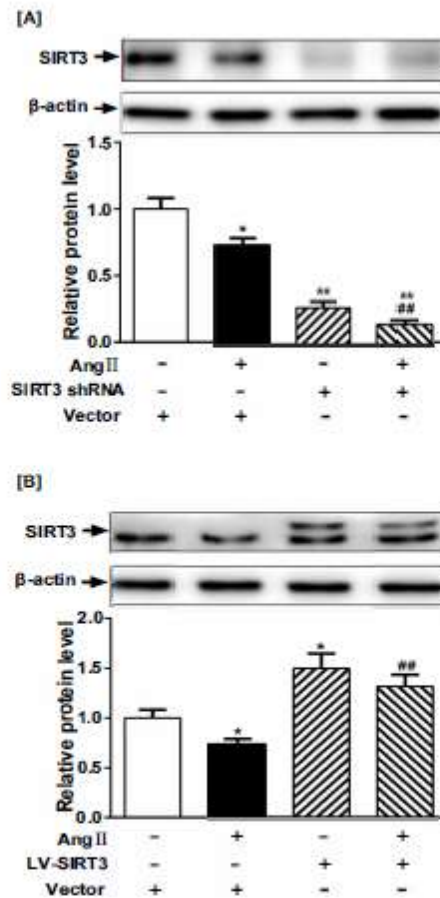

**Figure S3.** Graphical summary. SIRT3 drives Pink1/Parkin activity to increase rates of mitophagy in response to oxidative stress, and thereby limits the production of damaging ROS that would further promote angiogenesis.

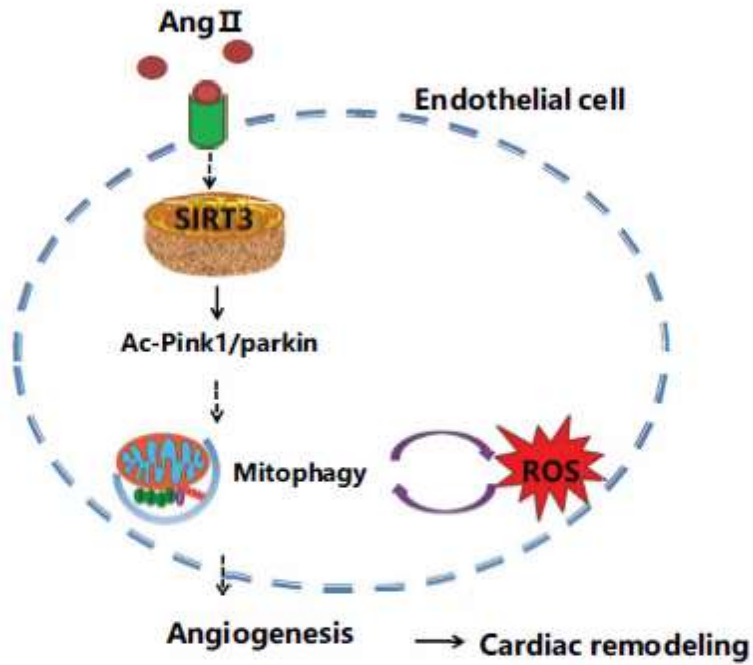

Supplement: JAH3-6-e006114-s001.pdf [file JAH3-6-e006114-s001.pdf]
